# Supplementary material
Source: Springer Nature journal article supplement (https://www.springermedizin.de/resource/supplementary/12936_2013_2782_MOESM2_ESM.pdf/9544254)
Supplement: MOESM2 [file 9544254]

■ **P. vivax** WHO first line treatment: CQ + PQ for 14 days

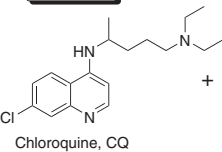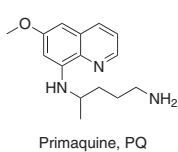

Countries: Argentina, Bolivia, Brazil, Colombia, Ecuador, French Guyana, Guyana, Paraguay, Peru, Suriname, Venezuela

\* Brazil and Peru have also adopted a 7-day course of PQ

■ **Uncomplicated P. falciparum**

WHO first line treatment: A+L, AS+amodiaquine, AS+MQ, AS+S+P, dihydroartemisinin+piperazine

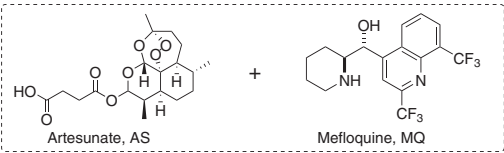

Countries: Bolivia, Brazil, Peru, Venezuela

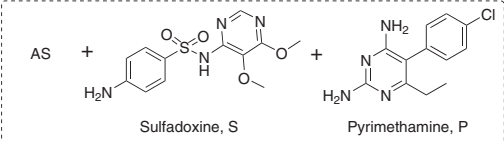

Country: Ecuador

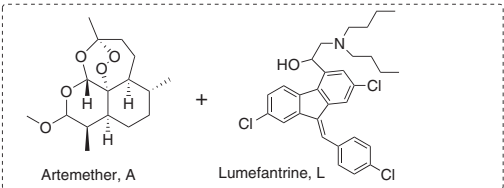

Countries: Brazil, Colombia, French Guyana, Guyana, Paraguay, Suriname

\*Ecuador uses A+L in case of failure of the uncomplicated P. falciparum treatment

■ **Severe falciparum malaria**

WHO first line treatment: AS (A and Q are acceptable alternatives if parenteral AS is not available)

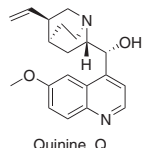

Countries: Bolivia, Colombia, Ecuador, Suriname, Venezuela

Artemether, A Countries: Brazil, Venezuela

Artesunate, AS Country: Brazil
